# Supplementary material for: Synthesis, structure and magnetic properties of a novel family of heterometallic nonanuclear NaI2MnIII6LnIII (Ln = Eu, Gd, Tb, Dy) complexes
Source: Royal Society of Chemistry journal article supplement (doi:10.1039/c0dt01746a), 2011-01-01
Supplement: c0dt01746a.pdf [file c0dt01746a.pdf]

## **SUPPORTING INFORMATION**

### **Synthesis, Structure and Magnetic Properties of a Novel Family of Heterometallic Nonanuclear $\text{Na}^{\text{I}}_2\text{Mn}^{\text{III}}_6\text{Ln}^{\text{III}}$ (Ln = Eu, Gd, Tb, Dy) Complexes**

Pei-Pei Yang<sup>a,b</sup>, Xiao-Ling Wang<sup>a</sup>, Li-Cun Li<sup>\*a</sup> and Dai-Zheng Liao<sup>a</sup>

<sup>a</sup>Department of Chemistry and Key Laboratory of Advanced Energy Materials Chemistry, Nankai University, 94 Weijing Road, Tianjin, 300071, People's Republic of China

<sup>b</sup>College of Chemistry and Materials Science, Huaibei Normal University, 100 Dongshan Road, Huaibei, Anhui, 235000, People's Republic of China

\*Author to whom correspondence should be addressed. Email: [llicun@nankai.edu.cn](mailto:llicun@nankai.edu.cn)

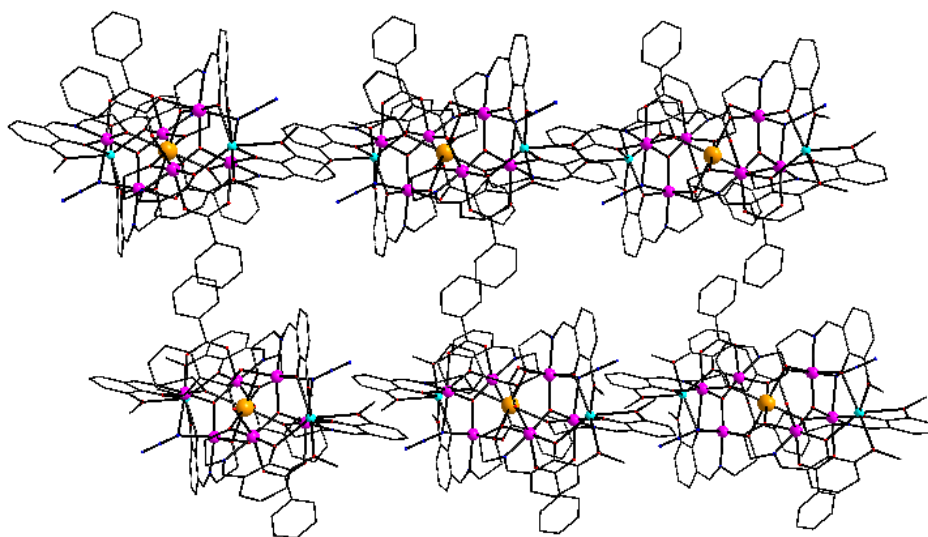

**Fig. S1.** The molecular packing structure of complex **2** (H atoms and solvent molecules are omitted for clarity).

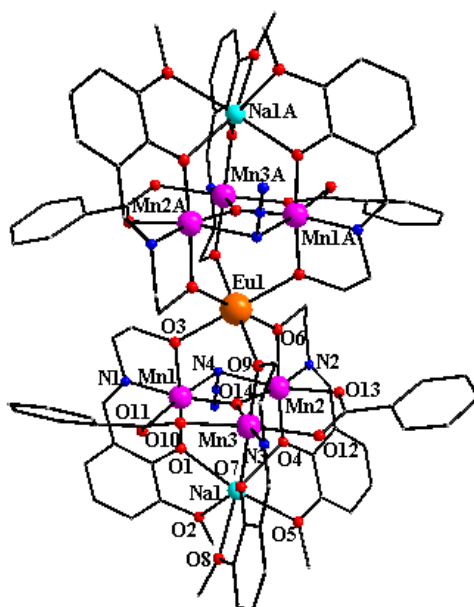

**Fig. S2.** Molecular structure of the cation  $[\text{Na}_2\{\text{Mn}_3^{\text{III}}(\mu_3\text{-O}^{2-})\}_2\text{Eu}^{\text{III}}(\text{hmmp})_6(\text{O}_2\text{CPh})_4(\text{N}_3)_2]^+$  in complex **1** (symmetry operation A:  $-x, -y, -z+1$ ; Hydrogen atoms, counterion and solvent molecules have been omitted for clarity.)

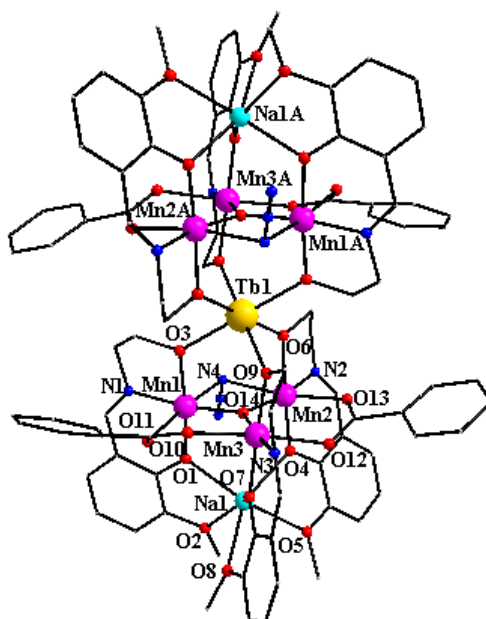

**Fig. S3.** Molecular structure of the cation  $[\text{Na}_2\{\text{Mn}_3^{\text{III}}(\mu_3\text{-O}^{2-})\}_2\text{Tb}^{\text{III}}(\text{hmmp})_6(\text{O}_2\text{CPh})_4(\text{N}_3)_2]^+$  in complex **3** (symmetry operation A:  $-x, -y, -z+1$ ; Hydrogen atoms, counterion and solvent molecules have been omitted for clarity).

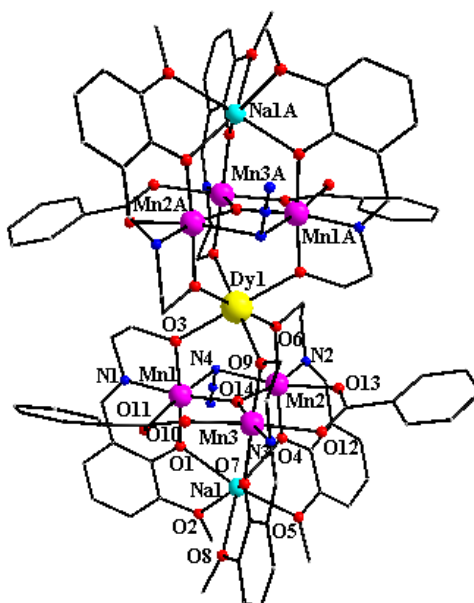

**Fig. S4.** Molecular structure of the cation  $[\text{Na}_2\{\text{Mn}_3^{\text{III}}(\mu_3\text{-O}^{2-})\}_2\text{Dy}^{\text{III}}(\text{hmmp})_6(\text{O}_2\text{CPh})_4(\text{N}_3)_2]^+$  in complex **4** (symmetry operation A:  $-x, -y, -z+1$ ; Hydrogen atoms, counterion and solvent molecules have been omitted for clarity).

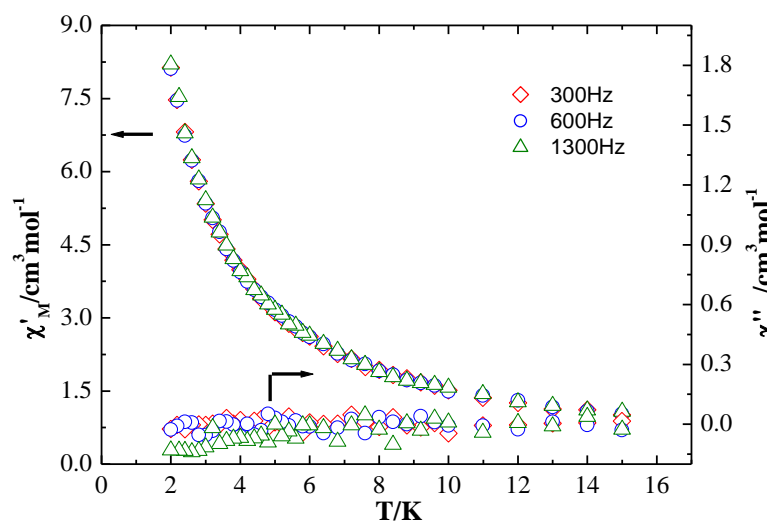

**Fig. S5.** Temperature dependence of the in-phase ( $\chi_M'$ ) and the out-of-phase ( $\chi_M''$ ) ac susceptibility components for **2** in a 3.5 G field oscillating at the indicated frequencies.

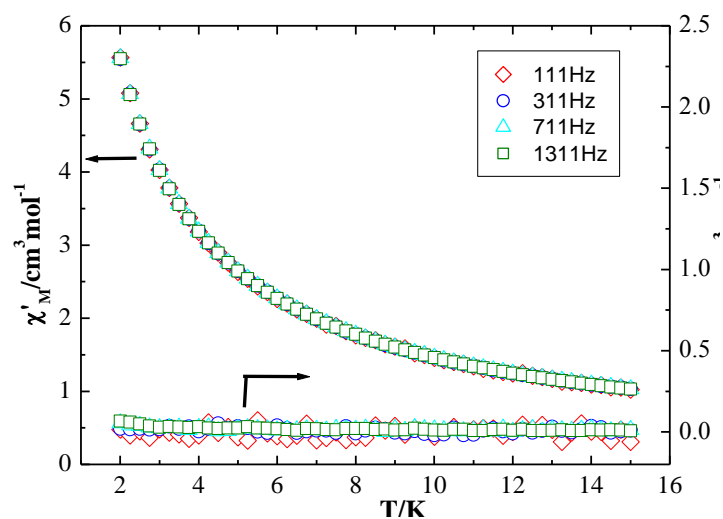

**Fig. S6.** Temperature dependence of the in-phase ( $\chi_M'$ ) and the out-of-phase ( $\chi_M''$ ) ac susceptibility components for **3** in a 3.5 G field oscillating at the indicated frequencies.

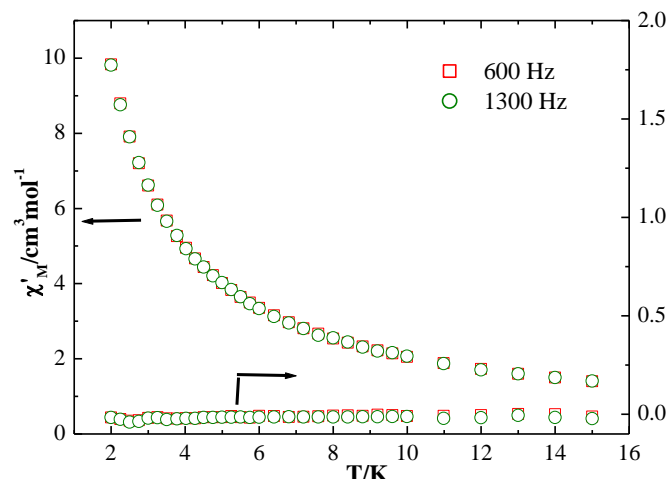

**Fig. S7.** Temperature dependence of the in-phase ( $\chi_M'$ ) and the out-of-phase ( $\chi_M''$ ) ac susceptibility components for **4** in a 3.5 G field oscillating at the indicated frequencies.
